# Supplementary material
Source: MDPI journal article supplement (https://www.mdpi.com/2072-4292/13/16/3071)
Supplement: s1 [file s1]

# Article

## Phytoplankton Bloom Dynamics in the Baltic Sea Using a Consistently Reprocessed Time Series of Multi-Sensor Reflectance and Novel Chlorophyll-a Retrievals

Vittorio E. Brando <sup>1,\*</sup>, Michela Sammartino <sup>1</sup>, Simone Colella <sup>1</sup>, Marco Bracaglia <sup>1</sup>, Annalisa Di Cicco <sup>1</sup>, Davide D'Alimonte <sup>2</sup>, Tamito Kajiyama <sup>2</sup>, Seppo Kaitala <sup>3</sup> and Jenni Attila <sup>3</sup>

<sup>1</sup> Consiglio Nazionale delle Ricerche, Istituto di Scienze Marine (CNR-ISMAR), 00133 Rome, Italy; michela.sammartino@artov.ismar.cnr.it (M.S.); simone.colella@cnr.it (S.C.); marco.bracaglia@artov.ismar.cnr.it (M.B.); annalisa.dicicco@artov.ismar.cnr.it (A.D.C.)

<sup>2</sup> Aequora, 1600-774 Lisbon, Portugal; davide.dalimonte@aequora.org (D.D.); tamito.kajiyama@aequora.org (T.K.)

<sup>3</sup> Finnish Environment Institute (SYKE), 00790 Helsinki, Finland; seppo.kaitala@ymparisto.fi (S.K.); Jenni.Attila@ymparisto.fi (J.A.)

\* Correspondence: Vittorio.brand@cnr.it

## Supplementary Materials

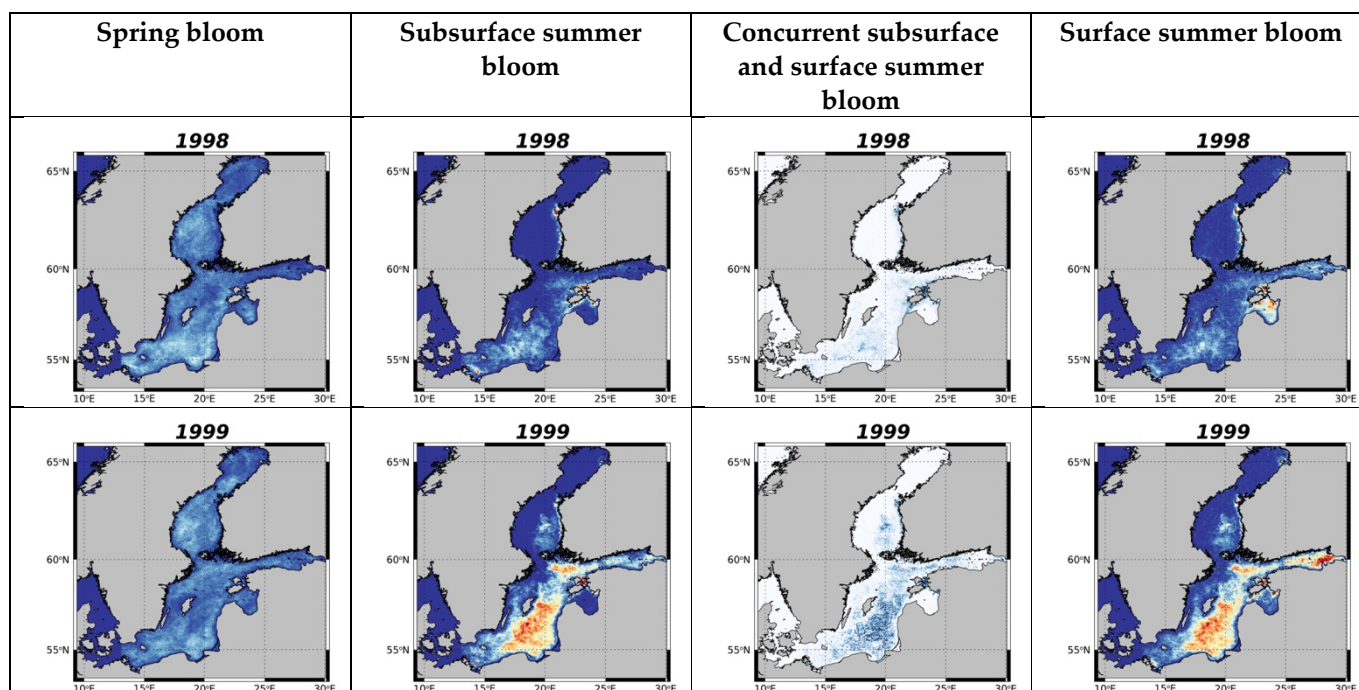

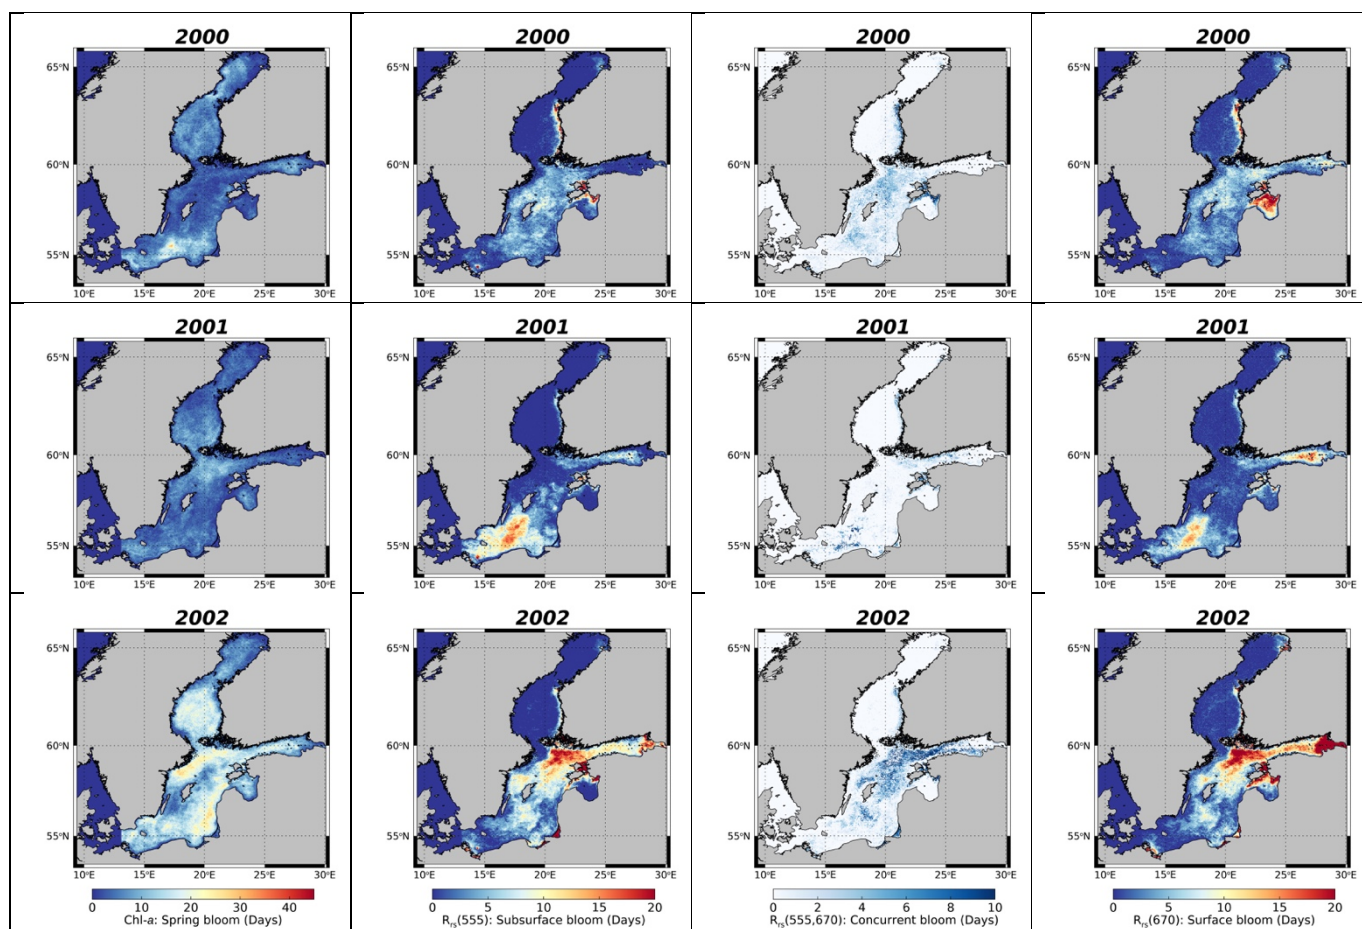

**Figure S1.** Spring and summer bloom spatio-temporal coverage from 1998 to 2019. First column: spring bloom; second column: subsurface summer bloom; third column: concurrent subsurface and surface summer bloom; fourth column: surface summer bloom.

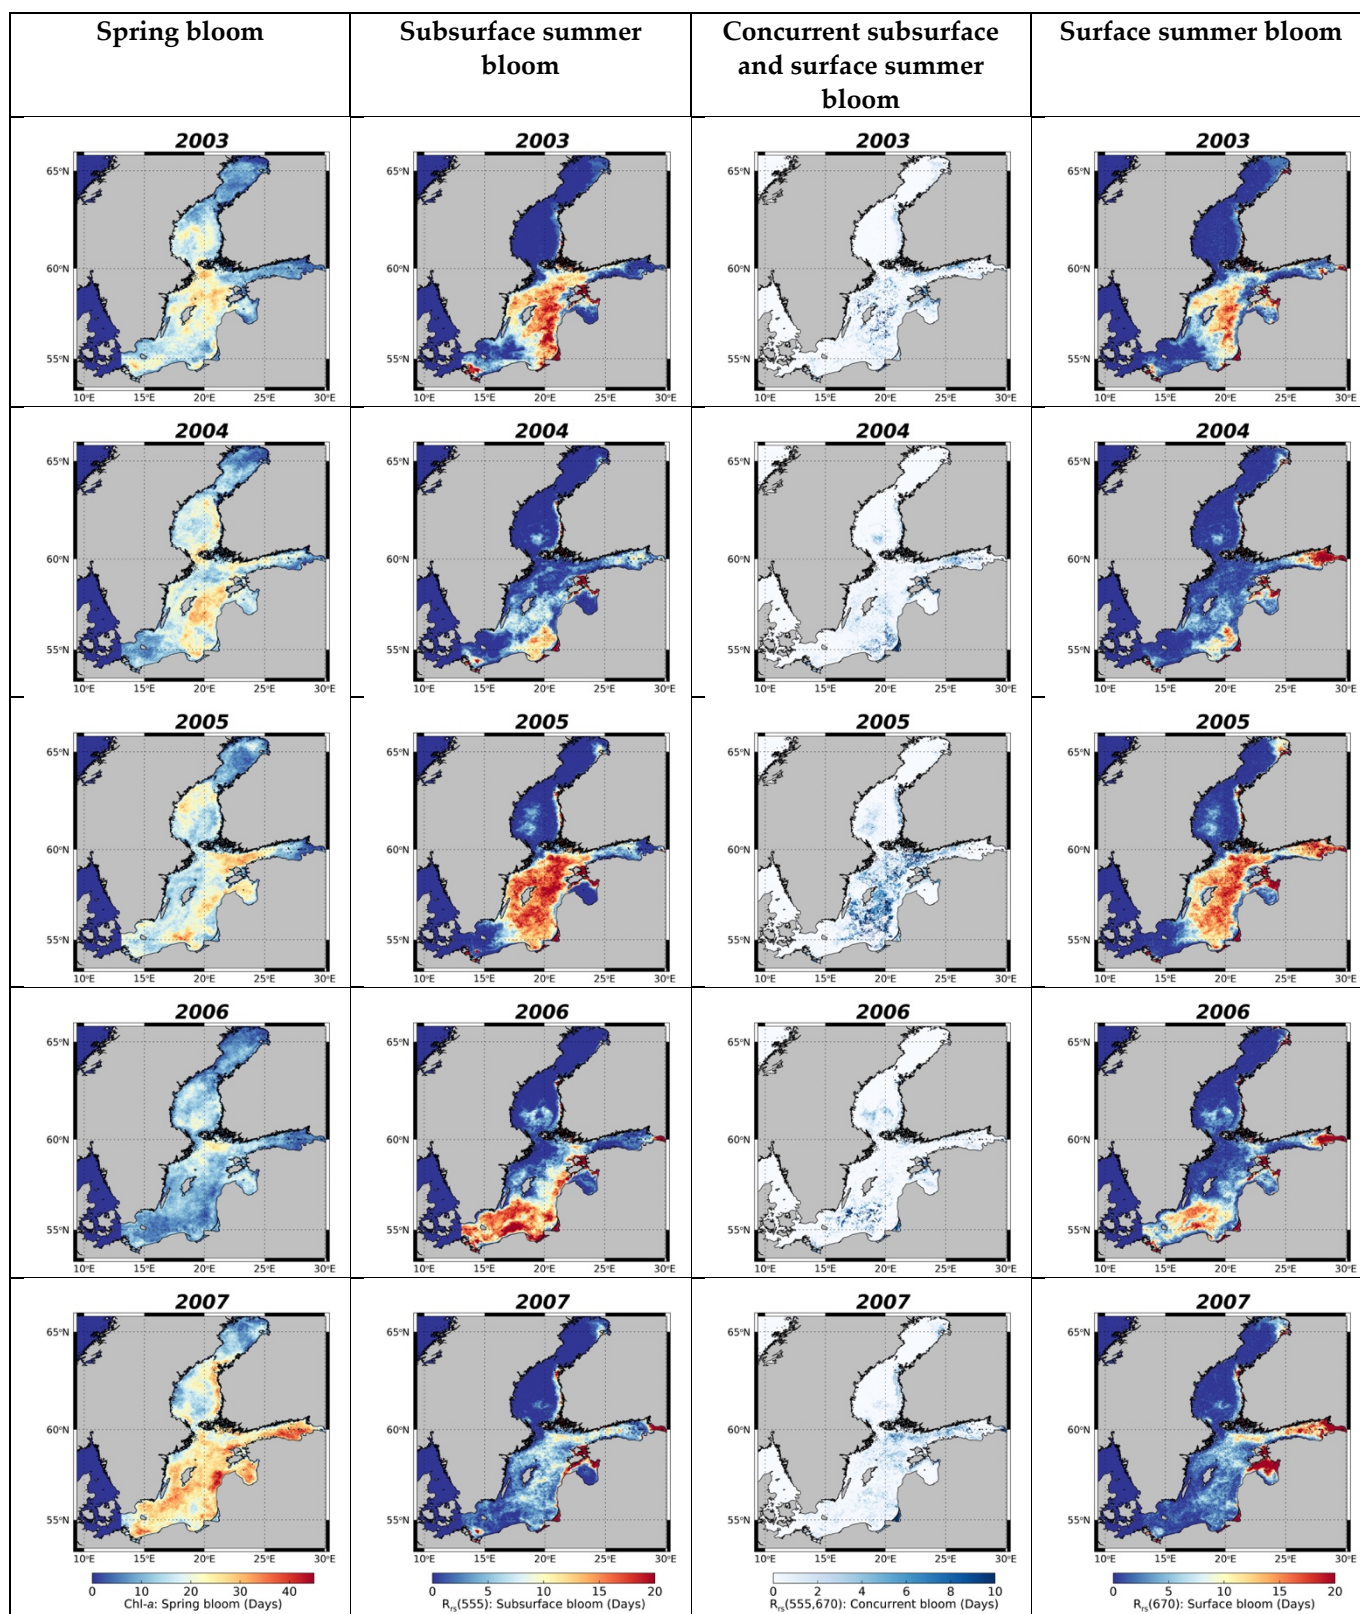

**Figure S1 (cont.)** Spring and summer bloom spatio-temporal coverage from 1998 to 2019. First column: spring bloom; second column: subsurface summer bloom; third column: concurrent subsurface and surface summer bloom; fourth column: surface summer bloom.



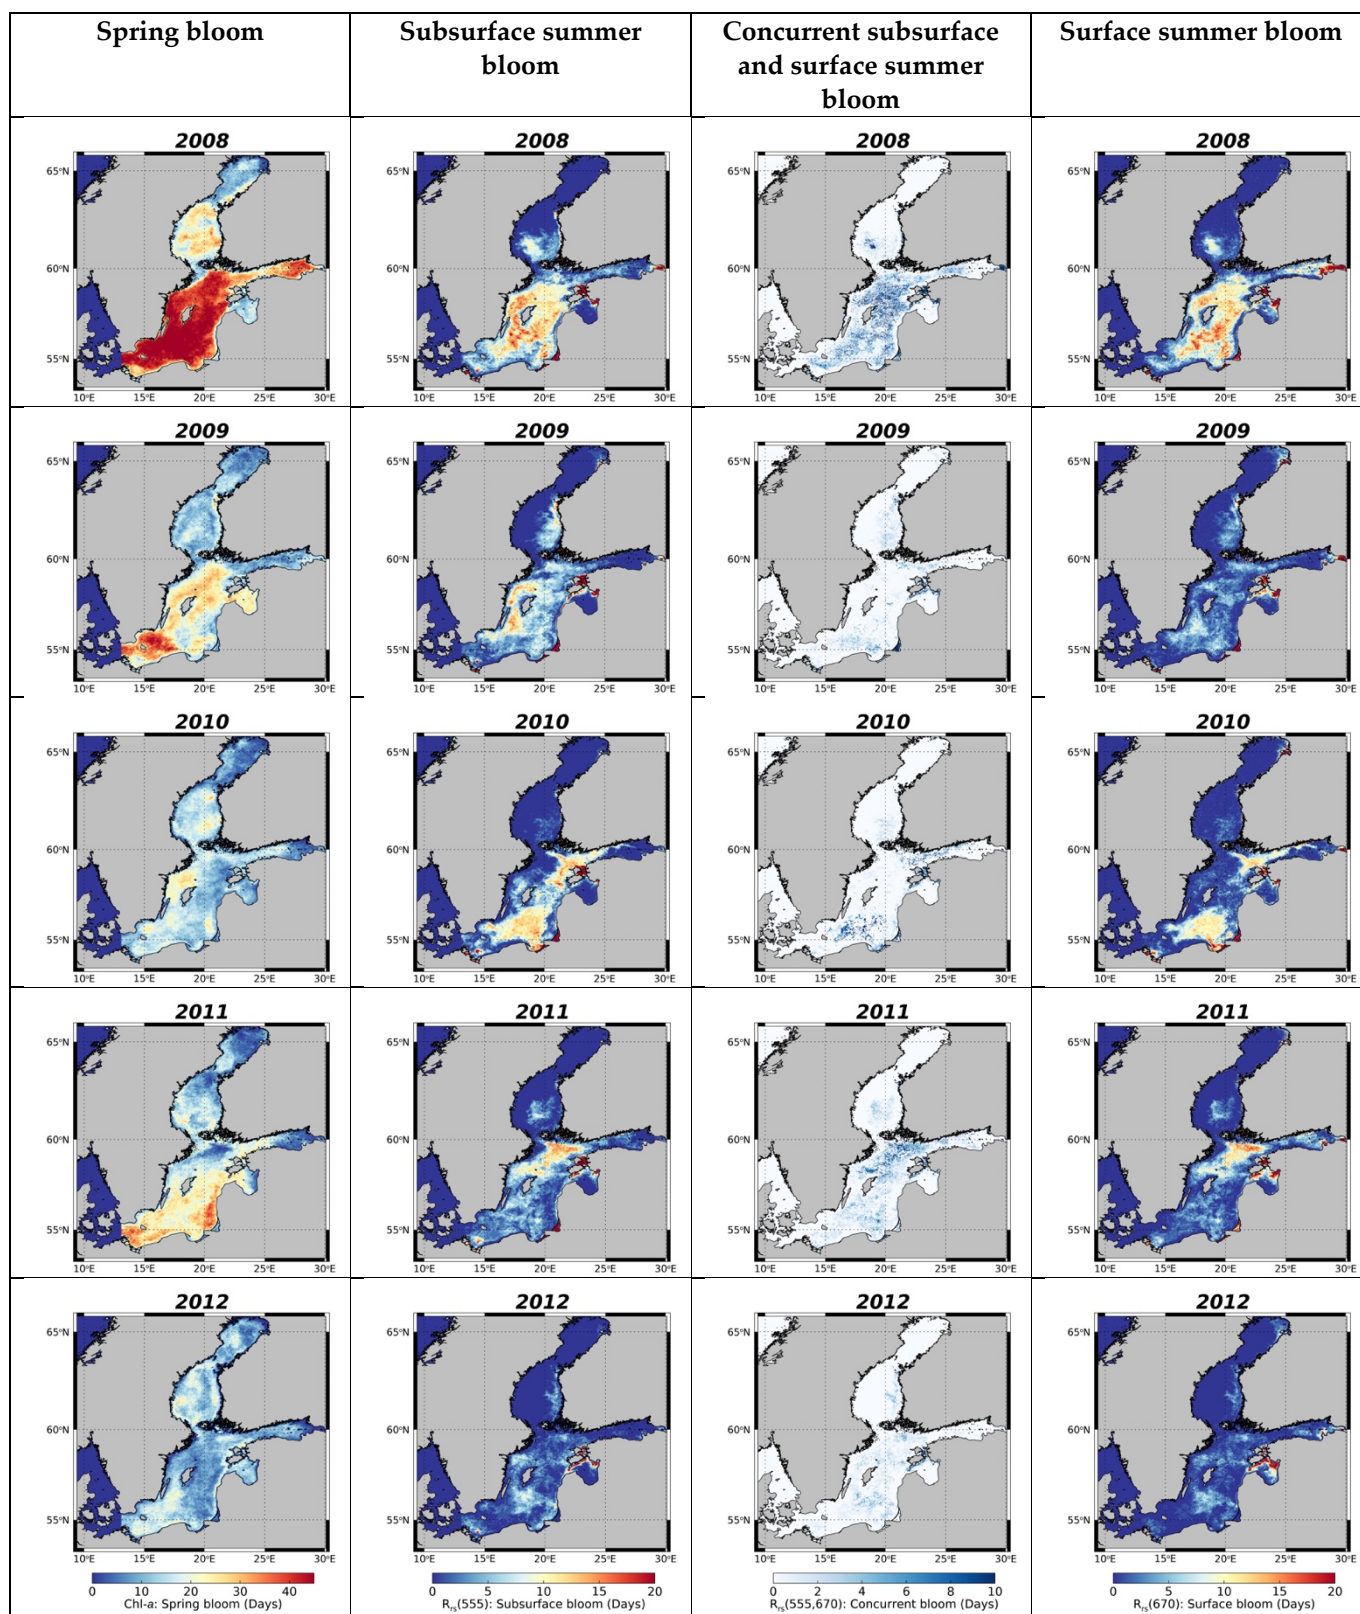

**Figure S1 (cont.)** Spring and summer bloom spatio-temporal coverage from 1998 to 2019. First column: spring bloom; second column: subsurface summer bloom; third column: concurrent subsurface and surface summer bloom; fourth column: surface summer bloom.



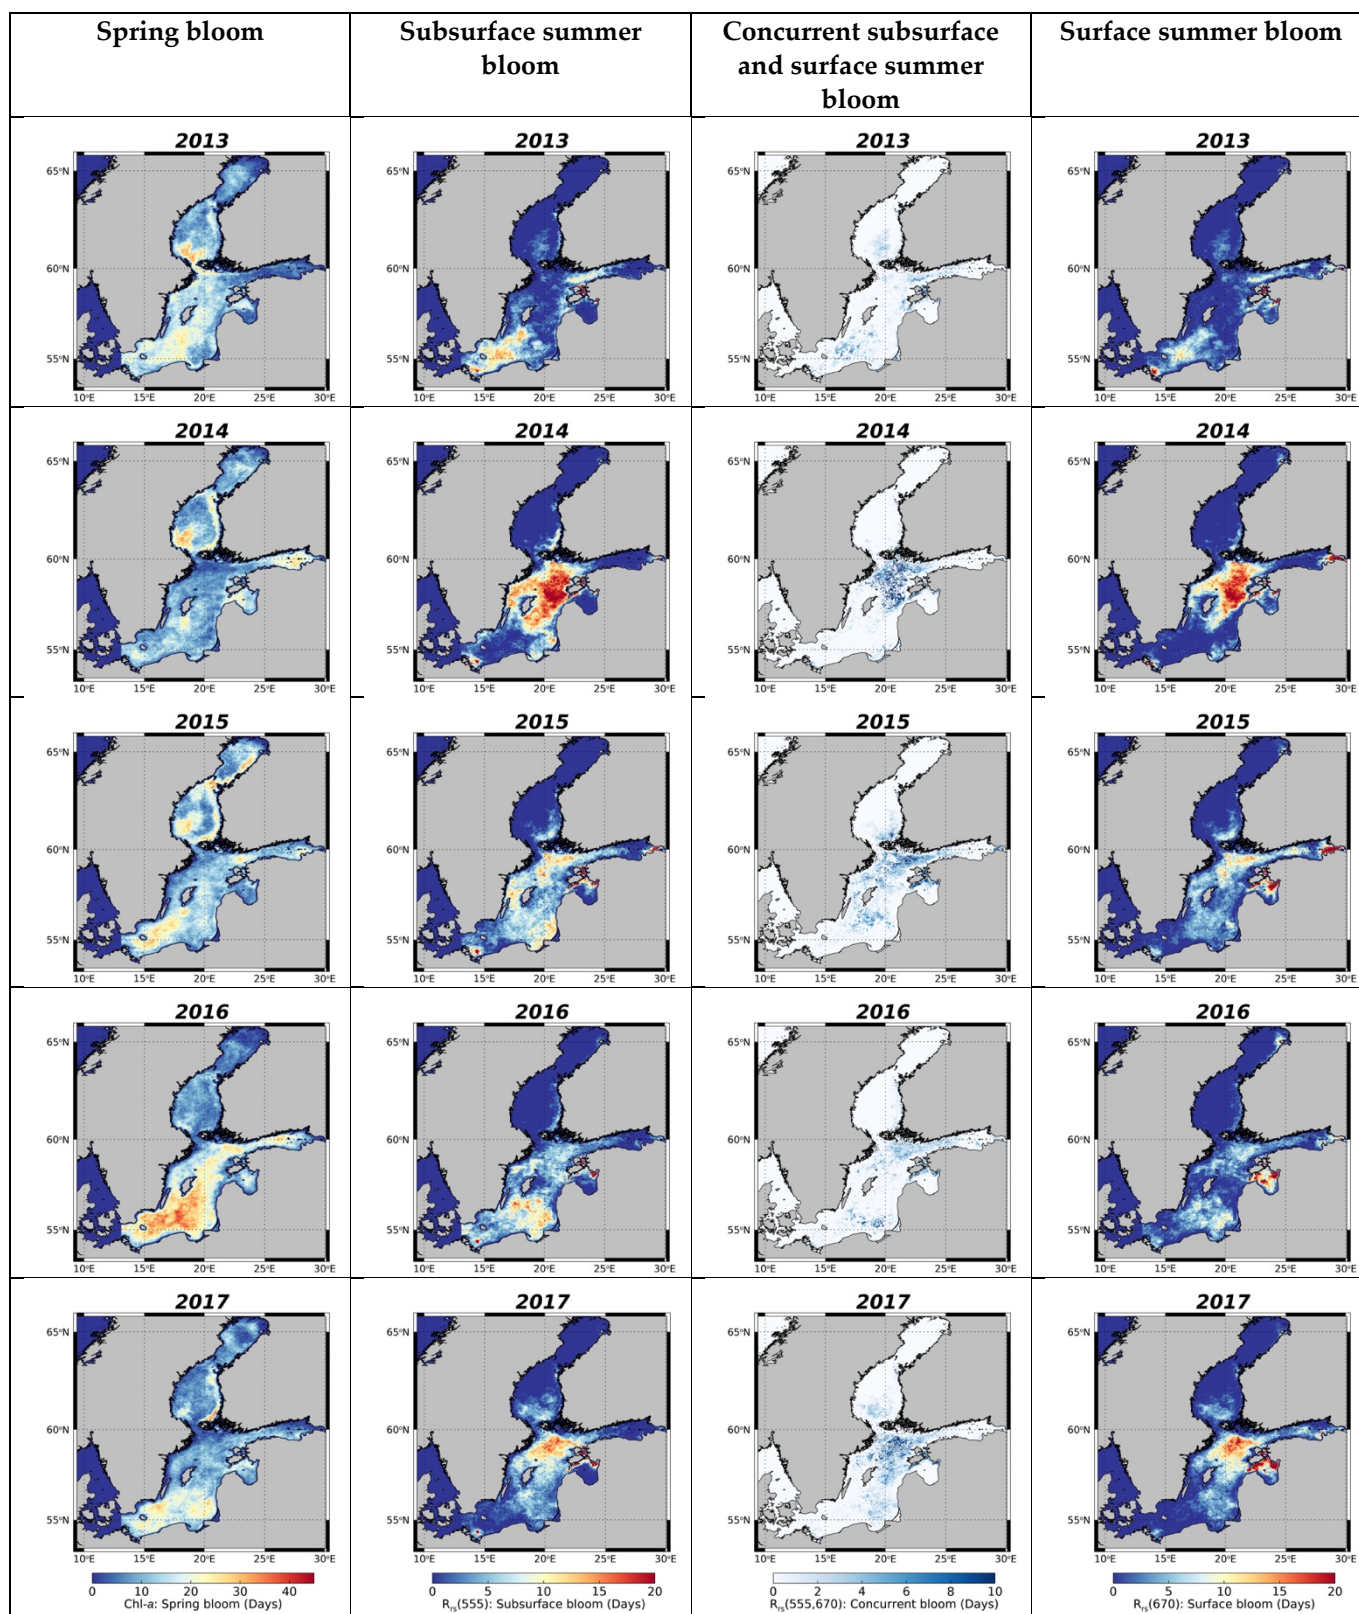

**Figure S1 (cont.)** Spring and summer bloom spatio-temporal coverage from 1998 to 2019. First column: spring bloom; second column: subsurface summer bloom; third column: concurrent subsurface and surface summer bloom; fourth column: surface summer bloom.

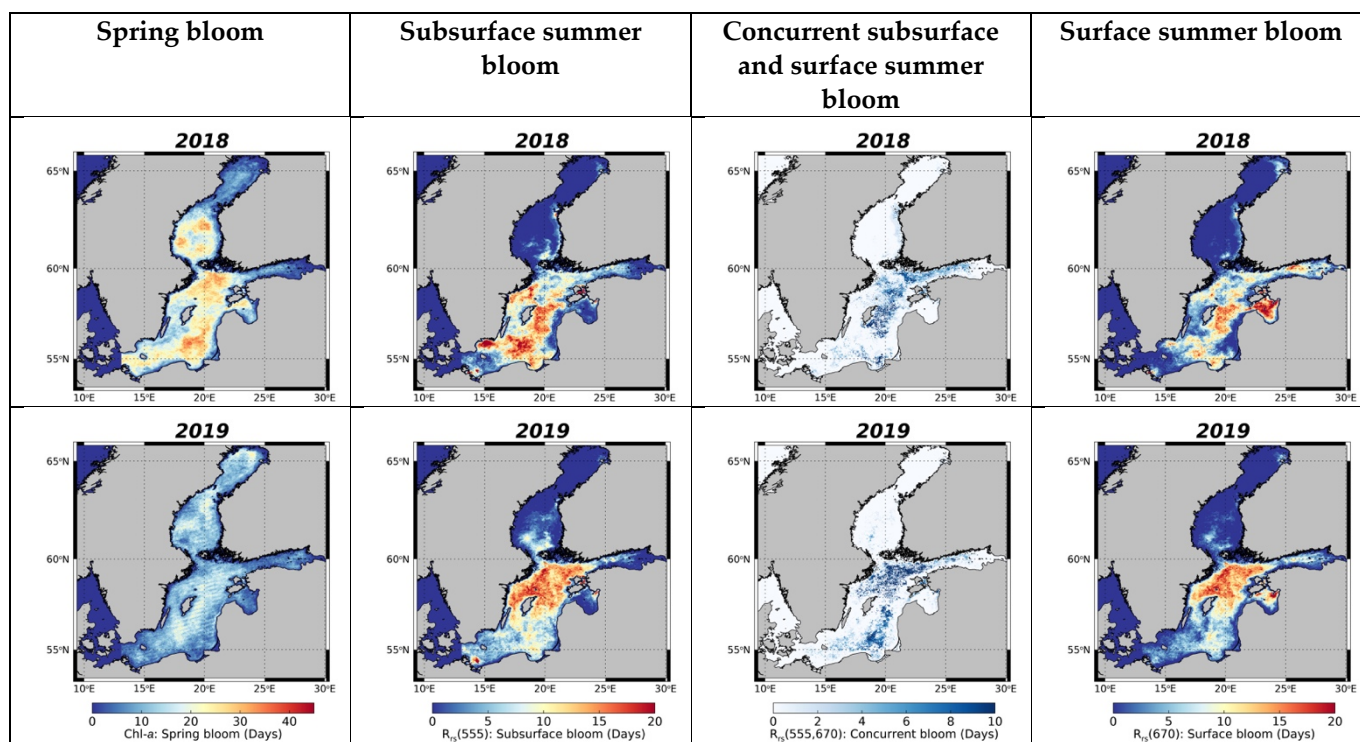

**Figure S1 (cont.)** Spring and summer bloom spatio-temporal coverage from 1998 to 2019. First column: spring bloom; second column: subsurface summer bloom; third column: concurrent subsurface and surface summer bloom; fourth column: surface summer bloom.

**Table S1.** Parameters set for *Chl $\alpha$ <sub>MLP\_6b</sub>* (a) Parameter sets to compute data pre- and post-processing, as well as MLP weights to derive Chl-*a*. (b) Eigenvectors and eigenvalues to define the MLP range of applicability.

|              |         |           |         |              |         |         |         |         |         |         |
|--------------|---------|-----------|---------|--------------|---------|---------|---------|---------|---------|---------|
| $\mu_i =$    | -3.1603 | -3.0312   | -2.8155 | -2.7409      | -2.6652 | -3.1614 |         |         |         |         |
| $\sigma_i =$ | 0.2588  | 0.1838    | 0.1592  | 0.1607       | 0.1756  | 0.2461  |         |         |         |         |
| $w^{(1)} =$  | -0.7985 | 0.2080    | -0.4472 | 0.4574       | 0.4361  | -0.1427 | -0.3852 | 0.2818  | -0.5851 | -0.2278 |
|              | 0.0232  | -0.1921   | -0.0594 | -0.0531      | 1.0587  | -0.2680 | -0.2595 | 1.9991  | 0.8481  | -0.2425 |
|              | 1.0904  | 0.4620    | 0.2267  | 0.5697       | 0.0892  | -0.0123 | 0.2390  | 0.7510  | 0.4695  | 0.2861  |
|              | -0.2053 | 1.6031    | 0.4763  | 0.2052       | -0.0905 | -0.7447 | 0.4032  | -0.1785 | 0.7916  | 0.0340  |
|              | -0.7415 | -0.2967   | 1.0456  | 0.1586       | 0.1314  | 1.0432  | 0.3897  | -0.3688 | -0.6143 | 0.1766  |
|              | -0.4006 | -0.5703   | 0.0161  | 0.8207       | 1.1073  | 1.0108  | 0.6197  | -0.5683 | -0.3330 | 0.5511  |
| $b^{(1)} =$  | 0.9228  | -0.0448   | 0.9684  | -0.6415      | -0.7833 | 0.3443  | -0.0358 | 0.1046  | -0.3144 | -0.2158 |
| $w^{(2)} =$  | -0.6977 | -1.4963   | 0.7168  | -0.0015      | 0.5500  | -0.6762 | 0.3854  | 0.9912  | -1.0978 | 0.1195  |
| $b^{(2)} =$  | 0.0222  | $\mu_c =$ | 0.4514  | $\sigma_c =$ | 0.4222  |         |         |         |         |         |

(a)

|                 |        |         |         |         |         |         |  |  |  |  |
|-----------------|--------|---------|---------|---------|---------|---------|--|--|--|--|
| $A_\eta =$      | 0.5414 | 0.4267  | -0.6601 | 0.2885  | 0.0760  | 0.0103  |  |  |  |  |
|                 | 0.3879 | 0.3196  | 0.1828  | -0.6344 | -0.5465 | -0.1131 |  |  |  |  |
|                 | 0.3491 | 0.1479  | 0.3957  | -0.1135 | 0.4552  | 0.6925  |  |  |  |  |
|                 | 0.3599 | 0.0411  | 0.4036  | 0.0934  | 0.4515  | -0.7023 |  |  |  |  |
|                 | 0.3717 | -0.2689 | 0.3437  | 0.6198  | -0.5226 | 0.1188  |  |  |  |  |
|                 | 0.4083 | -0.7873 | -0.3055 | -0.3294 | 0.1069  | 0.0126  |  |  |  |  |
| $\gamma_\eta =$ | 0.1902 | 0.0436  | 0.0073  | 0.0013  | 0.0002  | 0.0001  |  |  |  |  |

(b)

**Table S2.** Parameters set for *Chl $\alpha$ <sub>MLP\_5b</sub>* (a) Parameter sets to compute data pre- and post-processing, as well as MLP weights to derive Chl-*a*. (b) Eigenvectors and eigenvalues to define the MLP range of applicability.

|              |         |           |         |              |         |         |         |         |         |         |
|--------------|---------|-----------|---------|--------------|---------|---------|---------|---------|---------|---------|
| $\mu_i =$    | -3.0261 | -2.8167   | -2.7431 | -2.6652      | -3.1772 |         |         |         |         |         |
| $\sigma_i =$ | 0.1841  | 0.1593    | 0.1612  | 0.1756       | 0.2441  |         |         |         |         |         |
| $w^{(1)} =$  | -0.8149 | 0.6125    | 0.4886  | -1.7283      | 0.1723  | -1.3147 | -0.1986 | 0.5593  | -0.6074 | 1.0013  |
|              | 0.3055  | -0.2773   | 1.1680  | -0.0771      | -0.7164 | -0.5308 | -0.4648 | -0.5591 | 0.8691  | -0.2908 |
|              | -0.2188 | -0.0951   | -0.0473 | 0.7476       | -0.1234 | -0.7198 | 0.1384  | -1.5239 | -0.1378 | 0.3588  |
|              | 0.2802  | -0.3076   | 0.2593  | 0.3506       | 0.8223  | 0.6078  | 0.1276  | 0.1461  | 1.1880  | 0.1785  |
|              | 0.7466  | 0.4084    | 0.6168  | -0.6832      | 0.5256  | 0.4628  | -0.3990 | 0.5611  | -0.1750 | 0.7758  |
| $b^{(1)} =$  | 0.1153  | -0.2870   | 0.2634  | 0.3949       | -1.3440 | 1.0937  | 0.1572  | -0.1864 | 0.5544  | -0.4773 |
| $w^{(2)} =$  | -0.7542 | -0.5349   | -0.1937 | -1.3911      | 1.0037  | 1.0101  | 0.6200  | 1.1492  | 1.0607  | 0.5309  |
| $b^{(2)} =$  | 0.4042  | $\mu_c =$ | 0.4514  | $\sigma_c =$ | 0.4222  |         |         |         |         |         |

(a)

|                 |        |         |         |         |         |  |  |  |  |  |
|-----------------|--------|---------|---------|---------|---------|--|--|--|--|--|
| $A_\eta =$      | 0.4122 | 0.5290  | -0.5869 | 0.4455  | -0.0861 |  |  |  |  |  |
|                 | 0.3900 | 0.3457  | 0.1035  | -0.5035 | 0.6812  |  |  |  |  |  |
|                 | 0.4137 | 0.2326  | 0.2784  | -0.4306 | -0.7154 |  |  |  |  |  |
|                 | 0.4587 | -0.1118 | 0.6468  | 0.5851  | 0.1284  |  |  |  |  |  |
|                 | 0.5444 | -0.7308 | -0.3862 | -0.1423 | 0.0126  |  |  |  |  |  |
| $\gamma_\eta =$ | 0.1399 | 0.0333  | 0.0022  | 0.0002  | 0.0001  |  |  |  |  |  |

(b)



**Table S3.** Parameters set for *Chl $\tilde{a}$ <sub>MLP\_4b</sub>* (a) Parameter sets to compute data pre- and post-processing, as well as MLP weights to derive Chl-*a*. (b) Eigenvectors and eigenvalues to define the MLP range of applicability.

|                              |         |           |         |              |         |         |         |         |         |         |
|------------------------------|---------|-----------|---------|--------------|---------|---------|---------|---------|---------|---------|
| $\mu_i =$                    | 2.8167  | -2.7431   | -2.6652 | -3.1772      |         |         |         |         |         |         |
| $\sigma_i =$                 | 0.1593  | 0.1612    | 0.1756  | 0.2441       |         |         |         |         |         |         |
| $\mathbf{w}^{(1)} =$         | -0.6174 | 0.2034    | 0.7253  | 1.0515       | 0.0474  | 0.0997  | 0.6519  | -1.6656 | 0.6970  | -0.1716 |
|                              | -1.1127 | -0.1306   | 0.2030  | 1.1548       | -0.8705 | 0.0725  | 1.6561  | -0.2235 | 0.6987  | -0.6721 |
|                              | -0.2267 | -0.6301   | -0.7636 | -1.0589      | 0.1177  | -1.0289 | 0.4355  | 0.6953  | 0.1282  | 0.8138  |
|                              | 0.2296  | -0.2580   | -0.6872 | -0.4056      | 0.2398  | -0.1643 | -1.2418 | 0.1531  | 1.1594  | 0.7056  |
| $\mathbf{b}^{(1)} =$         | 0.4852  | -0.2917   | -0.1048 | -0.8069      | -0.2888 | -0.6771 | -0.2772 | -0.0232 | -0.8001 | -1.4607 |
| $\mathbf{w}^{(2)} =$         | 0.3641  | -0.3879   | 0.7258  | -0.8934      | 0.7117  | -0.6568 | -0.7913 | -1.0948 | 0.5985  | 1.0093  |
| $\mathbf{b}^{(2)} =$         | 0.2612  | $\mu_c =$ | 0.4514  | $\sigma_c =$ | 0.4222  |         |         |         |         |         |
| (a)                          |         |           |         |              |         |         |         |         |         |         |
| $\mathbf{A}_\eta =$          | 0.3906  | 0.5649    | -0.4288 | 0.5869       |         |         |         |         |         |         |
|                              | 0.4260  | 0.4463    | -0.0934 | -0.7814      |         |         |         |         |         |         |
|                              | 0.5037  | 0.0652    | 0.8349  | 0.2120       |         |         |         |         |         |         |
|                              | 0.6421  | -0.6910   | -0.3321 | -0.0049      |         |         |         |         |         |         |
| $\boldsymbol{\gamma}_\eta =$ | 0.1186  | 0.0222    | 0.0010  | 0.0001       |         |         |         |         |         |         |
| (b)                          |         |           |         |              |         |         |         |         |         |         |

**Table S4.** Parameters set for *Chl $\tilde{a}$ <sub>MLP\_3b</sub>* (a) Parameter sets to compute data pre- and post-processing, as well as MLP weights to derive Chl-*a*. (b) Eigenvectors and eigenvalues to define the MLP range of applicability.

|                              |         |           |         |              |         |         |         |         |         |         |
|------------------------------|---------|-----------|---------|--------------|---------|---------|---------|---------|---------|---------|
| $\mu_i =$                    | -2.8167 | -2.7431   | -2.6652 |              |         |         |         |         |         |         |
| $\sigma_i =$                 | 0.1593  | 0.1612    | 0.1756  |              |         |         |         |         |         |         |
| $\mathbf{w}^{(1)} =$         | -0.1130 | -1.9653   | -0.2763 | -1.1541      | 0.7444  | 2.2994  | 0.3464  | -0.4559 | 0.6394  | -0.4430 |
|                              | -0.6697 | -1.1620   | -0.5601 | -1.4582      | -0.5943 | 0.7033  | 0.4399  | 0.6821  | -0.9227 | -0.6920 |
|                              | 1.2962  | 0.4112    | -0.5035 | -0.4019      | 0.3570  | -1.8250 | -0.0413 | 0.2534  | -2.2069 | -0.2563 |
| $\mathbf{b}^{(1)} =$         | -1.2653 | 0.1386    | 0.0717  | -0.0869      | 0.4218  | -1.1003 | 0.2499  | -0.7008 | 0.8449  | -0.4670 |
| $\mathbf{w}^{(2)} =$         | 0.8700  | 0.8753    | 0.2782  | -0.9477      | 1.1105  | -0.7756 | -0.0016 | -0.4858 | -0.4832 | 0.2159  |
| $\mathbf{b}^{(2)} =$         | 0.2057  | $\mu_c =$ | 0.4514  | $\sigma_c =$ | 0.4222  |         |         |         |         |         |
| (a)                          |         |           |         |              |         |         |         |         |         |         |
| $\mathbf{A}_\eta =$          | 0.5537  | 0.5860    | 0.5916  |              |         |         |         |         |         |         |
|                              | 0.5753  | 0.2445    | -0.7806 |              |         |         |         |         |         |         |
|                              | 0.6021  | -0.7725   | 0.2017  |              |         |         |         |         |         |         |
| $\boldsymbol{\gamma}_\eta =$ | 0.0776  | 0.0046    | 0.0001  |              |         |         |         |         |         |         |
| (b)                          |         |           |         |              |         |         |         |         |         |         |
